# Supplementary material for: Metal-free catalysis for the Markovnikov hydrosilylation of styrene
Source: Royal Society of Chemistry journal article supplement (doi:10.1039/c9nj04333k), 2019-01-01
Supplement: c9nj04333k1.pdf [file c9nj04333k1.pdf]

## **Metal-free catalysis for the Markovnikov hydrosilylation of styrene**

Ming-Xia Zhang,<sup>a</sup> Rong-Lin Zhong,<sup>b</sup> Hong-Liang Xu<sup>\*a</sup> and Zhong-Min Su<sup>a,c</sup>

E-mail: hlxu@nenu.edu.cn

<sup>a</sup> Institute of Functional Material Chemistry, Department of Chemistry, National & Local United Engineering Lab for Power Battery, Northeast Normal University, Changchun 130024, Jilin, People's Republic of China

<sup>b</sup> Laboratory of Theoretical and Computational Chemistry, Institute of Theoretical Chemistry, Jilin University, Changchun, 130023, People's Republic of China

<sup>c</sup> School of Chemistry and Environmental Engineering, Changchun University of Science and Technology, Changchun, Jilin 130012, P. R. China

### **Contents**

|                    |                   |
|--------------------|-------------------|
| <b>Table S1~5</b>  | <b>Page 2~6</b>   |
| <b>Scheme</b>      | <b>Page 7</b>     |
| <b>Figure S1~2</b> | <b>Page 8~9</b>   |
| <b>Coordinates</b> | <b>Page 10~17</b> |

**Table S1.** Absolute (in au) and relative (in kcal/mol) energies of reactants, transition states, and products in hydrosilylation of styrene with phenylsilane in gas phase and THF solvent (values in square brackets).

|     | $E_{zp}^a$ | $E_{sp}^b$  | $E_{tot}^c$ | $E_{rel}^d$ |
|-----|------------|-------------|-------------|-------------|
| R1  | 0.1346     | -309.6492   | -309.5146   |             |
|     | [0.1345]   | [-309.6583] | [-309.5238] | 0.0         |
| R2  | 0.1161     | -522.9486   | -522.8325   | [0.0]       |
|     | [0.1159]   | [-522.9551] | [-522.8392] |             |
| TSX | 0.2524     | -832.5250   | -832.2726   | 46.8        |
|     | [0.2525]   | [-832.5418] | [-832.2893] | [46.2]      |
| PX  | 0.2569     | -832.6500   | -832.3931   | -28.9       |
|     | [0.2563]   | [-832.6641] | [-832.4077] | [-28.1]     |

a: zero point energies; b: single point energies; c: total energies of  $E_{zp}$  and  $E_{sp}$ ; d: relative energies

**Table S2.** Absolute (in au) and relative (in kcal/mol) energies of reactants, transition states, and products in Markovnikov hydrosilylation of styrene with phenylsilane at fs (field strength) =  $\pm 60 \times 10^{-4}$  au along FX directions in THF solvent. (Values in square brackets are those calculated at fs =  $-60 \times 10^{-4}$  au)

| FX  | $E_{zp}^a$ | $E_{sp}^b$  | $E_{tot}^c$ | $E_{rel}^d$ |
|-----|------------|-------------|-------------|-------------|
| R1  | 0.1343     | -309.6617   | -309.5275   |             |
|     | [0.1344]   | [-309.6611] | [-309.5266] | 0.0         |
| R2  | 0.1159     | -522.9571   | -522.8412   | [0.0]       |
|     | [0.1158]   | [-522.9567] | [-522.8409] |             |
| TSX | 0.2523     | -832.5437   | -832.2914   | 48.5        |
|     | [0.2519]   | [-832.5503] | [-832.2984] | [43.4]      |
| PX  | 0.2561     | -832.6709   | -832.4148   | -28.9       |
|     | [0.2563]   | [-832.6683] | [-832.4120] | [-27.9]     |

a: zero point energies; b: single point energies; c: total energies of  $E_{zp}$  and  $E_{sp}$ ; d: relative energies

**Table S3.** Energies of transition states at field-free, FX (-60) and FY ( $\pm 60$ ) (in  $10^{-4}$  au).

| EEF | F(0)      | FY(60)    | FX(-60)   | <b>FY(-60)</b>   |
|-----|-----------|-----------|-----------|------------------|
| E   | -832.2726 | -832.2973 | -832.2984 | <b>-832.2990</b> |

**Table S4.** Absolute (in au) energies of reactants, transition states, and products in Markovnikov hydrosilylation of styrene with phenylsilane at fs (field strength) = 0, -30,  $\pm 60$ , -90, -120, -150, and  $-180 \times 10^{-4}$  au along FY directions in THF solvent.

| FY    | $E_{zp}^a$ | $E_{sp}^b$ | $E_{tot}^c$ |
|-------|------------|------------|-------------|
| R1    | 0.1344     | -309.6599  | -309.5255   |
| {60   | 0.1345     | -309.6587  | -309.5242   |
| -30   | 0.1345     | -309.6599  | -309.5254   |
| -60   | 0.1344     | -309.6618  | -309.5274   |
| -90   | 0.1343     | -309.6646  | -309.5303   |
| -120  | 0.1339     | -309.6680  | -309.5342   |
| -150  | 0.1337     | -309.6736  | -309.5398   |
| -180} | 0.1156     | -522.9610  | -522.8453   |
| R2    | 0.1160     | -522.9546  | -522.8386   |
| {60   | 0.1157     | -522.9556  | -522.8399   |
| -30   | 0.1137     | -522.9582  | -522.8446   |
| -60   | 0.1150     | -522.9624  | -522.8474   |
| -90   | 0.1145     | -522.9683  | -522.8538   |
| -120  | 0.1137     | -522.9757  | -522.8620   |
| -150  | 0.2516     | -832.5489  | -832.2973   |
| -180} | 0.2528     | -832.5450  | -832.2922   |
| TSX   | 0.2527     | -832.5516  | -832.2990   |
| {60   | 0.2517     | -832.5613  | -832.3095   |
| -30   | 0.2514     | -832.5747  | -832.3234   |
| -60   | 0.2502     | -832.5918  | -832.3415   |
| -90   | 0.2481     | -832.6129  | -832.36478  |
| -120  | 0.2560     | -832.6671  | -832.4111   |
| -150  | 0.2563     | -832.6657  | -832.4094   |
| -180} | 0.2564     | -832.6696  | -832.4132   |
| PX    | 0.2559     | -832.6756  | -832.4196   |
| {60   | 0.2556     | -832.6839  | -832.4283   |
| -30   | 0.2540     | -832.6977  | -832.4437   |
| -60   | 0.2529     | -832.7133  | -832.4605   |
| -90   |            |            |             |
| -120  |            |            |             |
| -150  |            |            |             |
| -180} |            |            |             |

a: zero point energies; b: single point energies; c: total energies of  $E_{zp}$  and  $E_{sp}$ .

**Table S5.** The number of imaginary frequencies of reactants, transition states, and

products in Markovnikov hydrosilylation of styrene with phenylsilane, and the frequency values ( $\text{cm}^{-1}$ ) in brackets are those of transition states at different field strengths.

|          | R1 | R2 | TSX          | PX |
|----------|----|----|--------------|----|
| F(0)     | 0  | 0  | 1 (-1076.6i) | 0  |
| FX(60)   | 0  | 0  | 1 (-1130.7i) | 0  |
| FX(-60)  | 0  | 0  | 1 (-877.23i) | 0  |
| FY(60)   | 0  | 0  | 1 (-613.6i)  | 0  |
| FY(-30)  | 0  | 0  | 1 (-1067.1i) | 0  |
| FY(-60)  | 0  | 0  | 1 (-1061.5i) | 0  |
| FY(-90)  | 0  | 0  | 1 (-1048.2i) | 0  |
| FY(-120) | 0  | 0  | 1 (-1046.5i) | 0  |
| FY(-150) | 0  | 0  | 1 (-1046.1i) | 0  |
| FY(-180) | 0  | 0  | 1 (-1045.1i) | 0  |

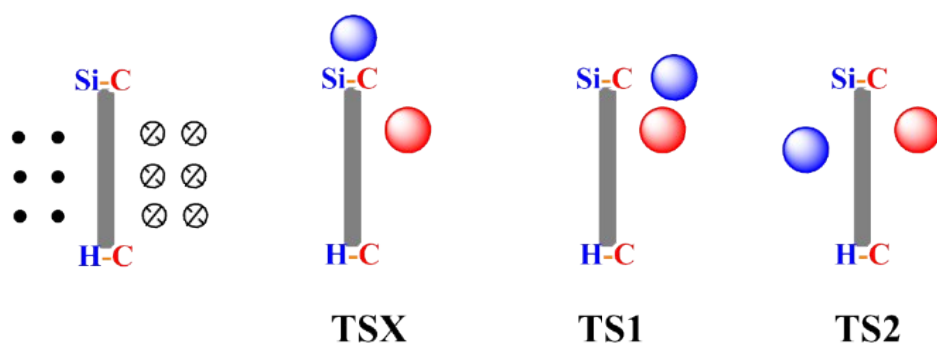

**Scheme S1.** Addition models of Markovnikov hydrosilylation of styrene with phenylsilane.

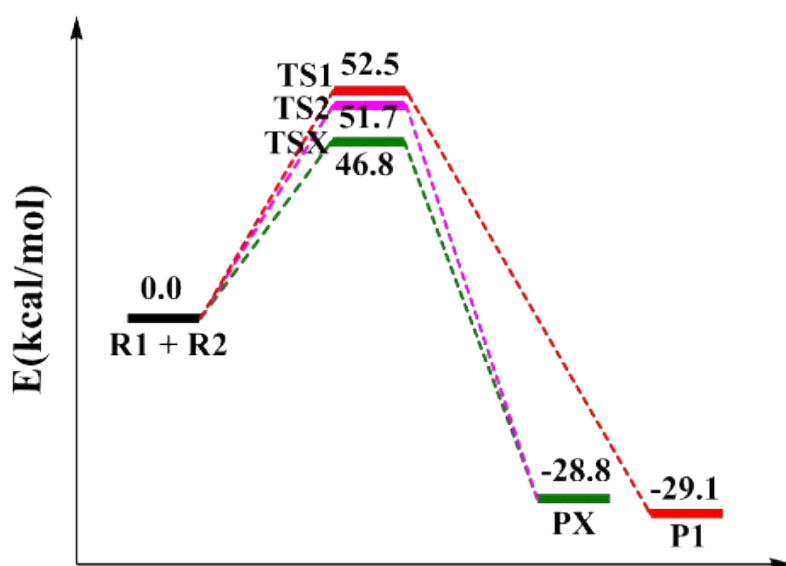

**Figure S1.** Relative energies (in kcal/mol) of Markovnikov hydrosilylation of styrene with phenylsilane through three pathways.



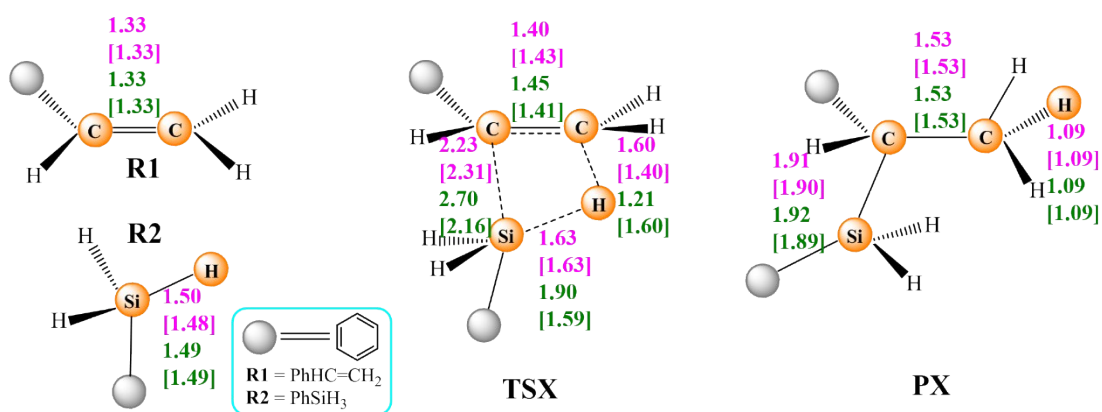

**Figure S2.** The structures of stationary points along potential energy surface in Markovnikov hydrosilylation of styrene with phenylsilane at fs (field strength) =  $\pm 60 \times 10^{-4}$  au along FX and FY directions in THF solvent (bond lengths are given in Å; FX, red; FY, green. Values in square brackets are those calculated at negative directions.)

## Coordinates of transition states

| <b>F(0)</b> |                 |                 |                 |
|-------------|-----------------|-----------------|-----------------|
| C           | -0.003873742137 | 0.019151656662  | 0.006353747123  |
| C           | 1.406018943247  | -0.006568461144 | -0.007416193106 |
| H           | 1.943800549126  | 0.306873276788  | -0.896578116974 |
| C           | -0.818841708722 | 0.442796171471  | -1.149337099026 |
| C           | -0.333066279854 | 0.475923450789  | -2.459905851021 |
| C           | -2.148692580942 | 0.818482189509  | -0.935515485794 |
| C           | -1.145275599568 | 0.875763214663  | -3.511497146340 |
| H           | 0.689399120351  | 0.185839865110  | -2.670731357168 |
| C           | -2.960078185654 | 1.218060881850  | -1.986046063945 |
| H           | -2.548846837726 | 0.794962452485  | 0.072478567193  |
| C           | -2.462789432348 | 1.249080774910  | -3.282780114639 |
| H           | -0.743099680298 | 0.893948238093  | -4.517820917935 |
| H           | -3.987324686750 | 1.503364547334  | -1.790934216079 |
| H           | -3.095426198853 | 1.560113425370  | -4.105329884062 |
| H           | 1.932299819824  | 0.164281423941  | 0.924756482365  |
| Si          | 0.525576974682  | -2.181106062312 | 0.023561015870  |
| H           | 0.303424004297  | -1.985526267765 | -1.439984422776 |
| H           | 1.941226225332  | -1.406252139417 | -0.115713858058 |
| H           | 0.543421365011  | -1.945149478561 | 1.501625491922  |
| C           | 0.194846356220  | -4.059051522273 | 0.080501970338  |
| C           | -0.055863098257 | -4.778550714017 | -1.089952499397 |
| C           | 0.190422667311  | -4.753466728102 | 1.292150799909  |
| C           | -0.301439231993 | -6.144985690073 | -1.055544032792 |
| H           | -0.062614010440 | -4.261191351934 | -2.045444593343 |
| C           | -0.051773826487 | -6.119976092084 | 1.337559436278  |
| H           | 0.377076388326  | -4.216706179253 | 2.218431409107  |
| C           | -0.298708494091 | -6.816484687236 | 0.160788916025  |
| H           | -0.496174960873 | -6.686303055376 | -1.974234065506 |
| H           | -0.051063487214 | -6.642398505250 | 2.287275886730  |
| H           | -0.490055777410 | -7.882894730531 | 0.192280511975  |
| H           | -0.474408594849 | 0.170265095907  | 0.969743684609  |

| <b>FX (60)</b> |                 |                |                 |
|----------------|-----------------|----------------|-----------------|
| C              | -0.017815763591 | 0.019159989551 | -0.005203695670 |
| C              | 1.385162813520  | 0.023168978198 | 0.005832187270  |
| H              | 1.933228603791  | 0.352304580167 | -0.870779304326 |
| C              | -0.838748806762 | 0.463229113673 | -1.158472259573 |
| C              | -0.333162561934 | 0.591803320631 | -2.453484522137 |
| C              | -2.185565268788 | 0.757411930306 | -0.940783623631 |
| C              | -1.150938577059 | 1.010033607044 | -3.493997532461 |
| H              | 0.703581633727  | 0.351594185853 | -2.662149926222 |

|    |                 |                 |                 |
|----|-----------------|-----------------|-----------------|
| C  | -3.003089895762 | 1.174733037718  | -1.980517027039 |
| H  | -2.601973467354 | 0.651459916609  | 0.054913948069  |
| C  | -2.488512576850 | 1.303492629892  | -3.263186504897 |
| H  | -0.744019981425 | 1.100325694402  | -4.494745093840 |
| H  | -4.047159899202 | 1.390573241280  | -1.789750085739 |
| H  | -3.129925654074 | 1.621901239909  | -4.075607485767 |
| H  | 1.895516792393  | 0.150010550082  | 0.953249876588  |
| Si | 0.476801055839  | -2.152337710924 | -0.024360275391 |
| H  | 0.365911819404  | -1.935437762461 | -1.500609279748 |
| H  | 1.948602235272  | -1.464808953057 | -0.134613167155 |
| H  | 0.573375275956  | -1.961829220963 | 1.463443152447  |
| C  | -0.187950327948 | -3.933505102837 | 0.014531329481  |
| C  | -0.594074922263 | -4.569888327118 | -1.161106862452 |
| C  | -0.391762598918 | -4.597553554225 | 1.226649197746  |
| C  | -1.186907611764 | -5.825230377333 | -1.130083827511 |
| H  | -0.477114073372 | -4.061972779682 | -2.114646213636 |
| C  | -0.981394196193 | -5.853801230735 | 1.267814960125  |
| H  | -0.116218292954 | -4.109698108315 | 2.158027265261  |
| C  | -1.382674797588 | -6.466515013447 | 0.086868774749  |
| H  | -1.528072121202 | -6.291122358652 | -2.047027680121 |
| H  | -1.159799348085 | -6.343441377885 | 2.218091171693  |
| H  | -1.874345169765 | -7.431573025424 | 0.117271350670  |
| H  | -0.508179467389 | 0.123998777834  | 0.955108753311  |

**FX (-60)**

|    |                 |                 |                 |
|----|-----------------|-----------------|-----------------|
| C  | -0.018124450377 | 0.028788575577  | 0.012172285219  |
| C  | 1.405496267747  | -0.030444341781 | -0.017848008300 |
| H  | 1.934375091362  | 0.285098045177  | -0.912969808523 |
| C  | -0.824260667164 | 0.425555798729  | -1.140929378174 |
| C  | -0.349299902412 | 0.397522947623  | -2.460791387732 |
| C  | -2.154303256003 | 0.832032722597  | -0.946762515204 |
| C  | -1.159886274732 | 0.764067757305  | -3.524591264374 |
| H  | 0.671705401908  | 0.100044951037  | -2.665628819701 |
| C  | -2.962340514678 | 1.198963515818  | -2.010888890665 |
| H  | -2.546348119390 | 0.868600768856  | 0.064800563184  |
| C  | -2.472818260574 | 1.166132104899  | -3.312718744337 |
| H  | -0.752360541048 | 0.739894118450  | -4.528721783985 |
| H  | -3.982036198629 | 1.519779226171  | -1.821244627285 |
| H  | -3.097190453304 | 1.462084173333  | -4.148016359838 |
| H  | 1.938564390043  | 0.196397650422  | 0.899791684554  |
| Si | 0.560095987791  | -2.202211875764 | 0.050040273542  |
| H  | 0.238203323208  | -2.025750353557 | -1.395468049750 |
| H  | 1.924922854262  | -1.323859557843 | -0.096801343336 |
| H  | 0.468843444236  | -1.941783954924 | 1.515968223885  |

|   |                 |                 |                 |
|---|-----------------|-----------------|-----------------|
| C | 0.600509973320  | -4.102072546437 | 0.103967469361  |
| C | 0.563340240034  | -4.855385324490 | -1.072372010580 |
| C | 0.756528053435  | -4.779552548929 | 1.315859467328  |
| C | 0.681486520568  | -6.238545722454 | -1.042641777849 |
| H | 0.467622938888  | -4.350899090456 | -2.030094463031 |
| C | 0.875350510569  | -6.162258015806 | 1.355584716541  |
| H | 0.815080026563  | -4.215889537643 | 2.242969146055  |
| C | 0.841168656403  | -6.891824856169 | 0.173450919257  |
| H | 0.682211181054  | -6.805043515455 | -1.966762414665 |
| H | 1.026875115866  | -6.669135536014 | 2.301453935633  |
| H | 0.968197601701  | -7.967890925379 | 0.198167484787  |
| H | -0.469217450644 | 0.220038147108  | 0.977730957979  |

**FY (60)**

|    |                 |                 |                 |
|----|-----------------|-----------------|-----------------|
| C  | 0.000206948525  | 0.005228645130  | 0.011100880400  |
| C  | 1.445940235983  | 0.000833126606  | -0.030468387589 |
| H  | 1.900224968856  | 0.531789088053  | -0.869023828384 |
| C  | -0.818495699727 | 0.300638744228  | -1.134594164768 |
| C  | -0.318866602730 | 0.325716413836  | -2.455686782707 |
| C  | -2.201846917618 | 0.553258210159  | -0.984935860085 |
| C  | -1.145457364766 | 0.581751199885  | -3.539632087377 |
| H  | 0.725229068480  | 0.099393616391  | -2.638880016077 |
| C  | -3.018592682712 | 0.808423654864  | -2.070077534014 |
| H  | -2.633773822913 | 0.509271775781  | 0.009957346033  |
| C  | -2.501436326458 | 0.830812000009  | -3.365033265641 |
| H  | -0.725170058713 | 0.556358157432  | -4.539588654136 |
| H  | -4.080084208331 | 0.966192144263  | -1.909572907843 |
| H  | -3.149287165497 | 0.995765149515  | -4.217675131377 |
| H  | 1.925382897680  | 0.277783267689  | 0.907787959958  |
| Si | 0.781011417619  | -2.581516303509 | 0.020381865766  |
| H  | 0.417500495469  | -2.116267212203 | -1.323519140403 |
| H  | 1.944024986856  | -1.090347175962 | -0.201128418790 |
| H  | 0.796498166581  | -2.041424118244 | 1.386644749926  |
| C  | 0.901922311829  | -4.410996119353 | 0.085016851794  |
| C  | 0.827233405242  | -5.186482959536 | -1.082984769486 |
| C  | 1.122460766270  | -5.056158931922 | 1.312523219475  |
| C  | 0.959802992640  | -6.563224753612 | -1.021825751557 |
| H  | 0.660196191159  | -4.711678013093 | -2.044642930845 |
| C  | 1.252711784571  | -6.432924091620 | 1.371027023876  |
| H  | 1.186786365918  | -4.478435447984 | 2.229494650452  |
| C  | 1.174400721452  | -7.184560408329 | 0.203604045668  |
| H  | 0.898828324926  | -7.158578995386 | -1.924221372595 |
| H  | 1.416914957840  | -6.927782439666 | 2.320075968207  |
| H  | 1.279975466790  | -8.261691347159 | 0.249801332098  |

|   |                 |                |                |
|---|-----------------|----------------|----------------|
| H | -0.480517503909 | 0.072288633992 | 0.979308389345 |
|---|-----------------|----------------|----------------|

**FY (-30)**

|    |                 |                 |                 |
|----|-----------------|-----------------|-----------------|
| C  | 0.008442308191  | -0.021959751252 | -0.001923037855 |
| C  | 1.415762332882  | 0.026455437801  | -0.003378791939 |
| H  | 1.951105429828  | 0.346223902871  | -0.891022500639 |
| C  | -0.820256731001 | 0.390372430267  | -1.159331510463 |
| C  | -0.327435431003 | 0.476763948099  | -2.462942911080 |
| C  | -2.159833328087 | 0.716058354820  | -0.937358746027 |
| C  | -1.146468503248 | 0.886509258132  | -3.505265992991 |
| H  | 0.707987273569  | 0.237742455984  | -2.674485285572 |
| C  | -2.978746609209 | 1.125238164510  | -1.978985076731 |
| H  | -2.559006746147 | 0.662292736406  | 0.069753394410  |
| C  | -2.475443315783 | 1.212349077737  | -3.270101034398 |
| H  | -0.738015893785 | 0.964833788111  | -4.505973946973 |
| H  | -4.010913241458 | 1.387409989232  | -1.779151383593 |
| H  | -3.109194206896 | 1.546033780117  | -4.082702856362 |
| H  | 1.930799426995  | 0.199294299629  | 0.934086694062  |
| Si | 0.602684057316  | -2.142484937104 | 0.013733903255  |
| H  | 0.417295803477  | -2.002930385179 | -1.466367156082 |
| H  | 2.022052446744  | -1.409898617694 | -0.110866057027 |
| H  | 0.631514340903  | -1.961827747555 | 1.504964860828  |
| C  | 0.218530581523  | -4.031779087026 | 0.073614671676  |
| C  | -0.048699666847 | -4.749358329138 | -1.093523677389 |
| C  | 0.183790944432  | -4.722557627053 | 1.285966786158  |
| C  | -0.338399303474 | -6.107851514071 | -1.056616345248 |
| H  | -0.035276051253 | -4.233283928248 | -2.049849010792 |
| C  | -0.102186651150 | -6.081154966131 | 1.336750449490  |
| H  | 0.379409799087  | -4.185360068081 | 2.210325555635  |
| C  | -0.364579346736 | -6.775655942661 | 0.161831046682  |
| H  | -0.547752609101 | -6.643681610268 | -1.975937193631 |
| H  | -0.126692268196 | -6.596382697044 | 2.290669600265  |
| H  | -0.592760875611 | -7.835372889396 | 0.196644307551  |
| H  | -0.469616965950 | 0.116255474184  | 0.960183244783  |

**FY (-60)**

|   |                 |                 |                 |
|---|-----------------|-----------------|-----------------|
| C | -0.001313808555 | -0.055046940028 | -0.009116132827 |
| C | 1.403778284573  | 0.045511308956  | -0.000194032514 |
| H | 1.935481822028  | 0.375847372745  | -0.885918998788 |
| C | -0.833489334070 | 0.353757422157  | -1.169526093709 |
| C | -0.336632673316 | 0.454378807970  | -2.469701119948 |
| C | -2.170217490529 | 0.682724993207  | -0.941959659011 |
| C | -1.151408895385 | 0.886374078755  | -3.506268677258 |
| H | 0.701294005238  | 0.225204098367  | -2.681072754433 |

|    |                 |                 |                 |
|----|-----------------|-----------------|-----------------|
| C  | -2.984839794091 | 1.114735563174  | -1.978277784509 |
| H  | -2.566873684956 | 0.631176692213  | 0.066223055771  |
| C  | -2.478196281609 | 1.218495413336  | -3.266408237254 |
| H  | -0.738699556357 | 0.991178285837  | -4.502687774198 |
| H  | -4.011048003376 | 1.395610466377  | -1.774021982678 |
| H  | -3.104123233434 | 1.584013370291  | -4.071245250123 |
| H  | 1.909200002131  | 0.223680015174  | 0.941381776834  |
| Si | 0.642500293072  | -2.121271083745 | 0.008433106230  |
| H  | 0.481541598403  | -2.028036226578 | -1.481048683623 |
| H  | 2.061521610310  | -1.405093577571 | -0.107081796724 |
| H  | 0.679490842660  | -1.982225735785 | 1.506922834915  |
| C  | 0.235796050673  | -4.026906760805 | 0.071808896489  |
| C  | -0.038614938552 | -4.746329315491 | -1.092339856282 |
| C  | 0.188856722447  | -4.716063893170 | 1.284470081345  |
| C  | -0.346236252527 | -6.101567437893 | -1.053477426171 |
| H  | -0.018700333821 | -4.230427249307 | -2.048926385277 |
| C  | -0.114539573451 | -6.071423379775 | 1.339657903621  |
| H  | 0.386767987459  | -4.176219055669 | 2.207030649477  |
| C  | -0.383724383999 | -6.767297034617 | 0.166470740712  |
| H  | -0.564117740048 | -6.634429053597 | -1.973281615416 |
| H  | -0.150863755881 | -6.580735800581 | 2.297082005598  |
| H  | -0.629587045177 | -7.823924753561 | 0.204140987117  |
| H  | -0.484906435162 | 0.076604409798  | 0.951674219731  |

**FY (-90)**

|    |                 |                 |                 |
|----|-----------------|-----------------|-----------------|
| C  | 0.008181133260  | 0.010462013212  | 0.024544721021  |
| C  | 1.418985285363  | 0.029206967487  | 0.013995597589  |
| H  | 1.950171931152  | 0.335502887824  | -0.881237827383 |
| C  | -0.792469730215 | 0.514288325210  | -1.123963701307 |
| C  | -0.340849146864 | 0.470662695320  | -2.443326124291 |
| C  | -2.016864921042 | 1.126190188507  | -0.856743608351 |
| C  | -1.085550296258 | 1.045865495421  | -3.462627307758 |
| H  | 0.617777946445  | 0.021849780169  | -2.679485246188 |
| C  | -2.759333834418 | 1.705164257908  | -1.876149214852 |
| H  | -2.366129155884 | 1.200963161486  | 0.167295326003  |
| C  | -2.295635983464 | 1.668392842722  | -3.183576732086 |
| H  | -0.701313863169 | 1.044002116222  | -4.475826451598 |
| H  | -3.683091381267 | 2.220483163380  | -1.642894641430 |
| H  | -2.853489506782 | 2.156861812863  | -3.972898632082 |
| H  | 1.950119982393  | 0.166969342960  | 0.948348000001  |
| Si | 0.516927503021  | -2.067179026346 | 0.040183455051  |
| H  | 0.344854695197  | -2.011343896627 | -1.450999583393 |
| H  | 1.984704402913  | -1.473531208091 | -0.111982661191 |
| H  | 0.607665891439  | -1.960385011726 | 1.540531756404  |

|   |                 |                 |                 |
|---|-----------------|-----------------|-----------------|
| C | -0.023646073678 | -3.960274501191 | 0.127390610141  |
| C | -0.352115104020 | -4.675341990087 | -1.025811761502 |
| C | -0.103944716674 | -4.636199080561 | 1.346029754516  |
| C | -0.741366733186 | -6.009585275279 | -0.971968737847 |
| H | -0.312277465867 | -4.167881114519 | -1.986623967240 |
| C | -0.490356610256 | -5.970073245257 | 1.418616718612  |
| H | 0.131640174675  | -4.097834552616 | 2.260911496989  |
| C | -0.810259711998 | -6.661735329870 | 0.254836676486  |
| H | -1.004431631833 | -6.533843545841 | -1.885743266974 |
| H | -0.556420802831 | -6.463099374347 | 2.383702002380  |
| H | -1.127775460436 | -7.699682484484 | 0.305879755786  |
| H | -0.448469821454 | 0.180407586567  | 0.993043597435  |

**FY (-120)**

|    |                 |                 |                 |
|----|-----------------|-----------------|-----------------|
| C  | -0.040961256878 | -0.011717326815 | 0.011270942862  |
| C  | 1.372344656571  | 0.027117434455  | 0.011067568146  |
| H  | 1.903344244268  | 0.343833859787  | -0.880959066299 |
| C  | -0.829417657119 | 0.506082894489  | -1.141512292384 |
| C  | -0.375865185294 | 0.448312905791  | -2.459655691627 |
| C  | -2.022843603245 | 1.174718782491  | -0.870707136220 |
| C  | -1.087862774773 | 1.069217921779  | -3.475928108086 |
| H  | 0.568252602021  | -0.032128582934 | -2.694142704054 |
| C  | -2.730687944957 | 1.801171161864  | -1.887184637175 |
| H  | -2.365550187718 | 1.269676982581  | 0.153887402329  |
| C  | -2.264681137912 | 1.751891719200  | -3.193236689734 |
| H  | -0.697128728178 | 1.067458770861  | -4.486656890760 |
| H  | -3.621641488515 | 2.370168353647  | -1.650863266068 |
| H  | -2.788910023570 | 2.284908869770  | -3.976854899946 |
| H  | 1.895577896943  | 0.168606909718  | 0.949634998373  |
| Si | 0.490515469636  | -2.064531658152 | 0.035322837801  |
| H  | 0.325061303164  | -2.052372366150 | -1.458753580057 |
| H  | 1.956333183453  | -1.472740385410 | -0.117333303245 |
| H  | 0.587690702601  | -1.987304071873 | 1.537826420041  |
| C  | -0.030819176388 | -3.987735918475 | 0.133758674886  |
| C  | -0.360588559276 | -4.715833359944 | -1.011770528275 |
| C  | -0.081589961903 | -4.665493198354 | 1.353873702526  |
| C  | -0.721190305041 | -6.058562570352 | -0.950634587251 |
| H  | -0.345504584492 | -4.208011256258 | -1.973501251795 |
| C  | -0.437220053912 | -6.007967593554 | 1.435846698894  |
| H  | 0.153224089338  | -4.117579306824 | 2.263699507954  |
| C  | -0.758002463552 | -6.711649612680 | 0.278262573306  |
| H  | -0.989199538068 | -6.587878171164 | -1.861109159096 |
| H  | -0.480996539748 | -6.497399151706 | 2.404948188184  |
| H  | -1.055506533703 | -7.756611207109 | 0.336633907151  |

|   |                 |                |                |
|---|-----------------|----------------|----------------|
| H | -0.500938133760 | 0.161630541319 | 0.978219189625 |
|---|-----------------|----------------|----------------|

**FY (-150)**

|    |                 |                 |                 |
|----|-----------------|-----------------|-----------------|
| C  | -0.099097214432 | -0.027631609515 | -0.007597801416 |
| C  | 1.317524578470  | 0.016253942842  | 0.000949850701  |
| H  | 1.849216482464  | 0.340448782490  | -0.888483896225 |
| C  | -0.871452917530 | 0.510254112554  | -1.162721116014 |
| C  | -0.417140237238 | 0.438264309666  | -2.480380521665 |
| C  | -2.026075129242 | 1.242392967639  | -0.886024030010 |
| C  | -1.090007517873 | 1.110106999945  | -3.491417412939 |
| H  | 0.508891007054  | -0.077501289373 | -2.714817216111 |
| C  | -2.691321234997 | 1.922630604170  | -1.897148007892 |
| H  | -2.360589124377 | 1.356756962998  | 0.139298334695  |
| C  | -2.224502777634 | 1.859718076450  | -3.202357984749 |
| H  | -0.693471277175 | 1.106517434152  | -4.499945958910 |
| H  | -3.540660907734 | 2.550351727896  | -1.655747172038 |
| H  | -2.708727010792 | 2.440480185937  | -3.977942402515 |
| H  | 1.834387837212  | 0.160536775965  | 0.943080931060  |
| Si | 0.442027104333  | -2.066907867146 | 0.026784009660  |
| H  | 0.278599119701  | -2.099477715458 | -1.467559654700 |
| H  | 1.906486362196  | -1.475396239678 | -0.128935009431 |
| H  | 0.544646526315  | -2.015879416996 | 1.529786544689  |
| C  | -0.047586652358 | -4.027275690095 | 0.141054018178  |
| C  | -0.367373803932 | -4.777234085974 | -0.994790031250 |
| C  | -0.064368849926 | -4.702762775528 | 1.364969396968  |
| C  | -0.684731137259 | -6.131036864576 | -0.922195028571 |
| H  | -0.378918151707 | -4.273918435468 | -1.959456436876 |
| C  | -0.375127773983 | -6.055979367418 | 1.460525754807  |
| H  | 0.162967309757  | -4.139819883841 | 2.268065319155  |
| C  | -0.685908479505 | -6.780078370618 | 0.311050548690  |
| H  | -0.948132340317 | -6.672575606211 | -1.828183246641 |
| H  | -0.392374076761 | -6.538178924647 | 2.435142924151  |
| H  | -0.951701590386 | -7.834740216313 | 0.379985165704  |
| H  | -0.560241122925 | 0.150964476492  | 0.958459129062  |

**FY (-180)**

|   |                 |                 |                 |
|---|-----------------|-----------------|-----------------|
| C | -0.205323227314 | -0.040345809559 | -0.034135831060 |
| C | 1.216122385538  | -0.014824640423 | -0.014938609959 |
| H | 1.750645007630  | 0.315751206830  | -0.901105463800 |
| C | -0.946135331553 | 0.534051640844  | -1.190485359845 |
| C | -0.502928143223 | 0.419015454873  | -2.510243588585 |
| C | -2.015853352670 | 1.385511229475  | -0.906391579657 |
| C | -1.099836354072 | 1.167826652269  | -3.514981286093 |
| H | 0.372293624028  | -0.180298476885 | -2.746107137310 |



|    |                 |                 |                 |
|----|-----------------|-----------------|-----------------|
| C  | -2.598355107633 | 2.146763531162  | -1.911269634858 |
| H  | -2.331851019155 | 1.537798917799  | 0.120009625232  |
| C  | -2.140774605783 | 2.041429427218  | -3.217329728626 |
| H  | -0.706253038228 | 1.133272346112  | -4.524245836610 |
| H  | -3.366603725523 | 2.869993352815  | -1.664789709791 |
| H  | -2.551351993336 | 2.687385167852  | -3.984306418330 |
| H  | 1.726181987124  | 0.130016226512  | 0.931445394902  |
| Si | 0.331976314429  | -2.083806726890 | 0.014799355828  |
| H  | 0.163685077948  | -2.164345018114 | -1.476065579437 |
| H  | 1.793981353559  | -1.487815385929 | -0.146073057930 |
| H  | 0.433354795943  | -2.052723959070 | 1.516585482060  |
| C  | -0.085378763814 | -4.095655439809 | 0.151577437983  |
| C  | -0.376068022303 | -4.883079464637 | -0.969799312232 |
| C  | -0.036457809194 | -4.764792449374 | 1.381097811344  |
| C  | -0.609909304585 | -6.253246231151 | -0.878529590198 |
| H  | -0.433542751033 | -4.391736319079 | -1.939614748979 |
| C  | -0.260975224823 | -6.133682707464 | 1.497195271080  |
| H  | 0.174309275901  | -4.178233210392 | 2.273822056803  |
| C  | -0.543491398406 | -6.892765156178 | 0.360351152457  |
| H  | -0.851682401712 | -6.819388659390 | -1.777352427848 |
| H  | -0.222633727690 | -6.604397291179 | 2.478050779969  |
| H  | -0.744609287773 | -7.962791854340 | 0.445393345952  |
| H  | -0.667298232648 | 0.144396646058  | 0.930887187907  |
